# Supplementary material for: Coupling of indium clusters with atomic Fe–N4 on carbon for long-term rechargeable Zn–air batteries
Source: Royal Society of Chemistry journal article supplement (doi:10.1039/d4ee04465g), 2024-12-05
Supplement: d4ee04465g1.pdf [file d4ee04465g1.pdf]

Electronic Supplementary Material (ESI) for Energy & Environmental Science.

This journal is © The Royal Society of Chemistry 2022

## Supporting Information

### **Coupling of Indium Clusters with Atomic Fe-N<sub>4</sub> on Carbon for Long-term Rechargeable Zn-**

#### **Air Batteries**

Xinxin Shu, Xueying Cao, Bowen He, XunYi Chen, Lanling Zhao, Chengdong Yang, Jizhen Ma, and Jintao Zhang\*

Key Laboratory for Colloid and Interface Chemistry of State Education Ministry, School of Chemistry and Chemical Engineering, Shandong University, Jinan 250100

\*Corresponding Author(s): [jtzhang@sdu.edu.cn](mailto:jtzhang@sdu.edu.cn)

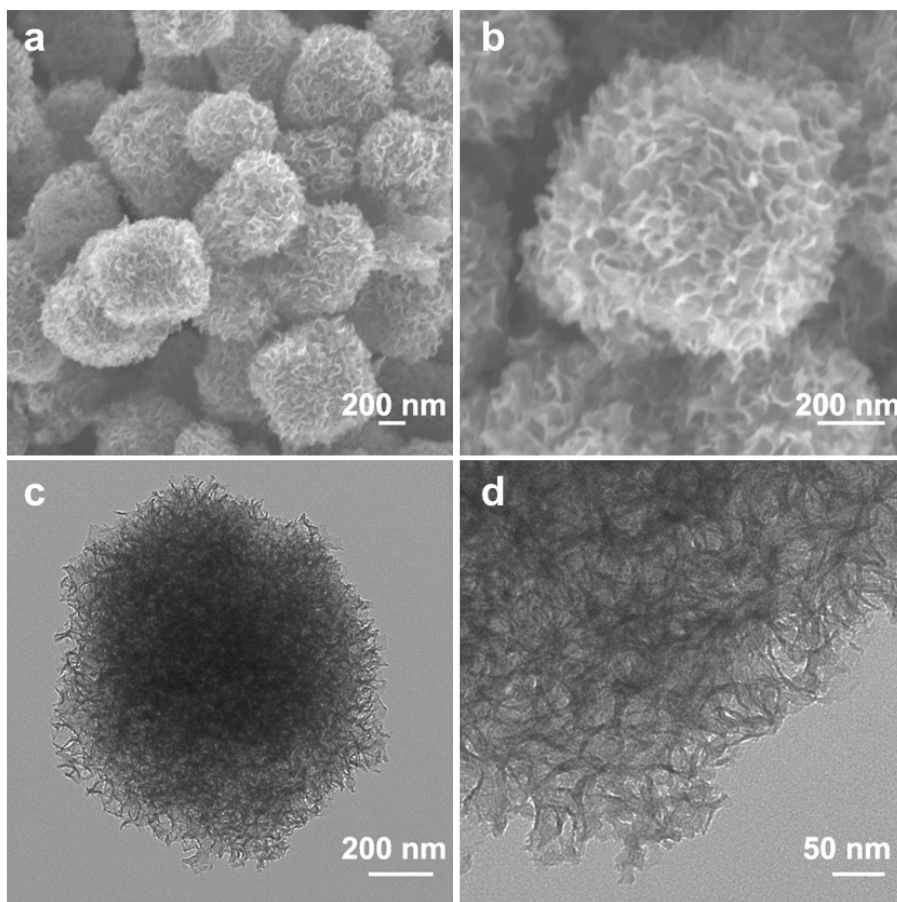

**Figure S1** (a, b) SEM images and (c, d) TEM images of In/NC samples.

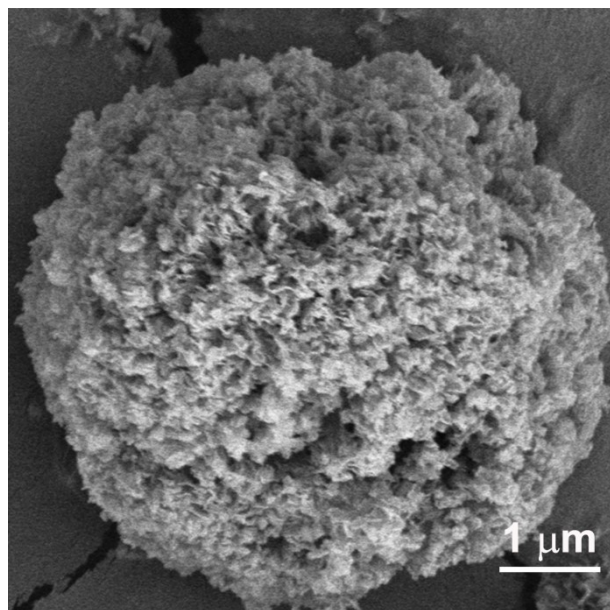

**Figure S2** The SEM image of folic acid and melamine (FM) supermolecules.

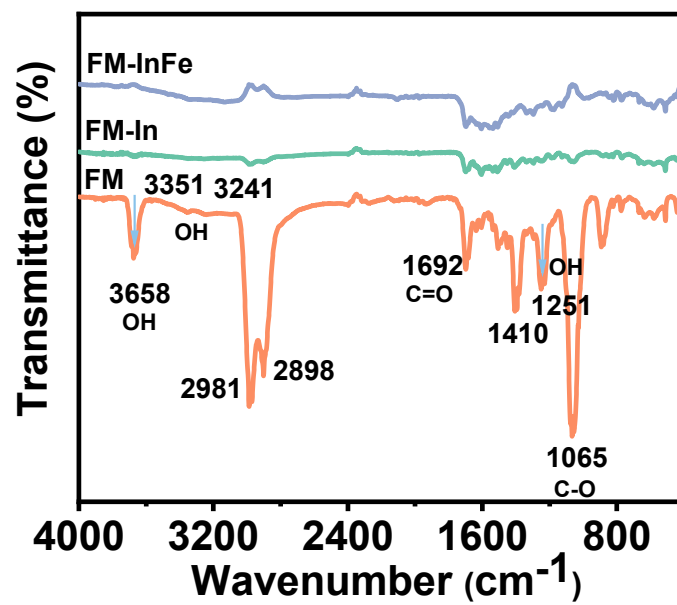

**Figure S3** The Fourier transform infrared spectrum of FM, FM-In and FM-InFe supermolecules.

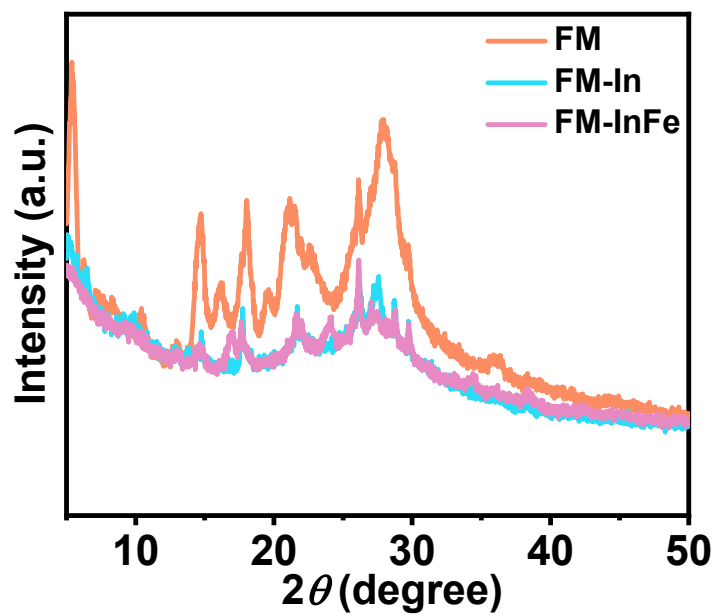

**Figure S4** The XRD patterns of FM, FM-In, and FM-InFe supermolecules.

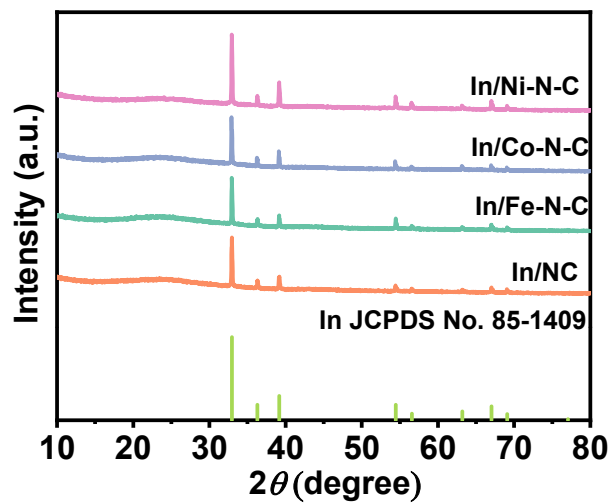

**Figure S5** XRD patterns of In/NC, In/Fe-N-C, In/Co-N-C, and In/Ni-N-C samples.

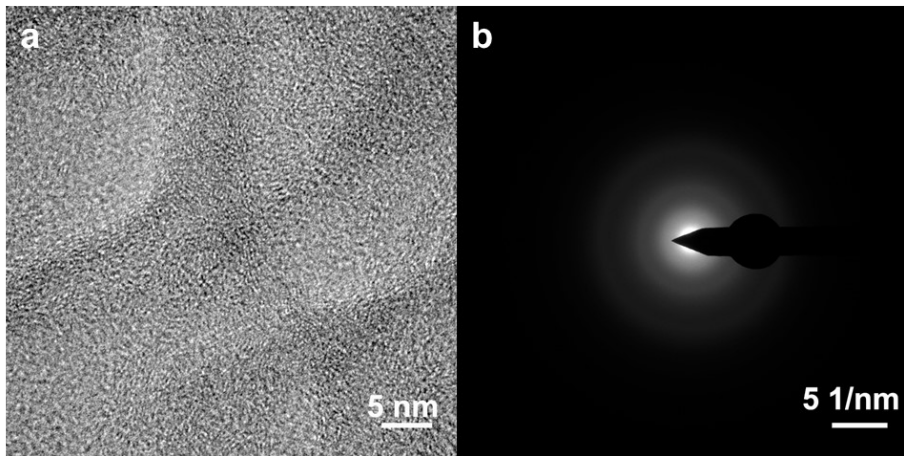

**Figure S6** (a) High-resolution TEM image and (b) the selection electron diffraction diagram of In/Fe-N-C sample.

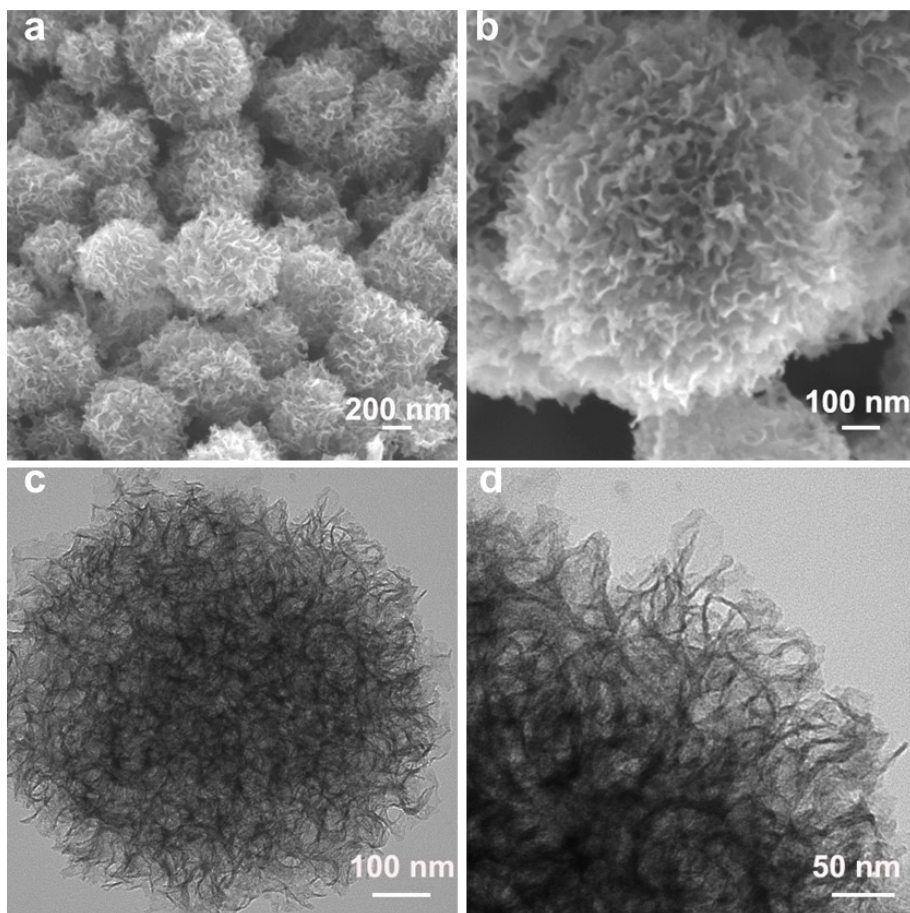

**Figure S7** (a, b) The SEM images and (c, d) the TEM images of In/Co-N-C samples.



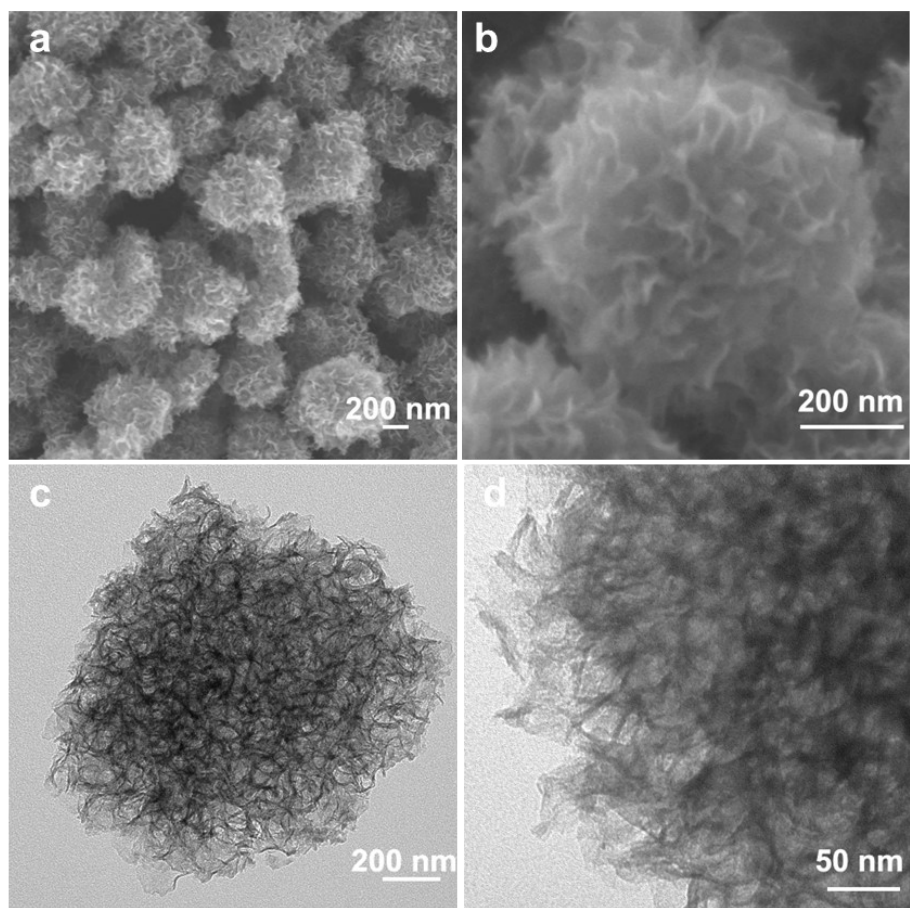

**Figure S8** (a, b) The SEM images and (c, d) the TEM images of In/Ni-N-C samples.

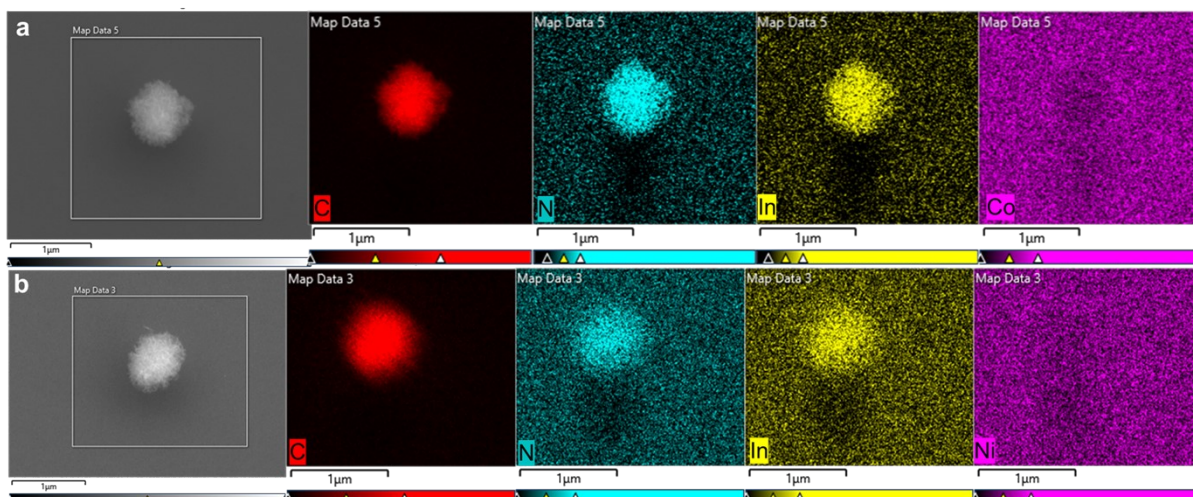

**Figure S9** The mapping images of (a) In/Co-N-C and (b) In/Ni-N-C.

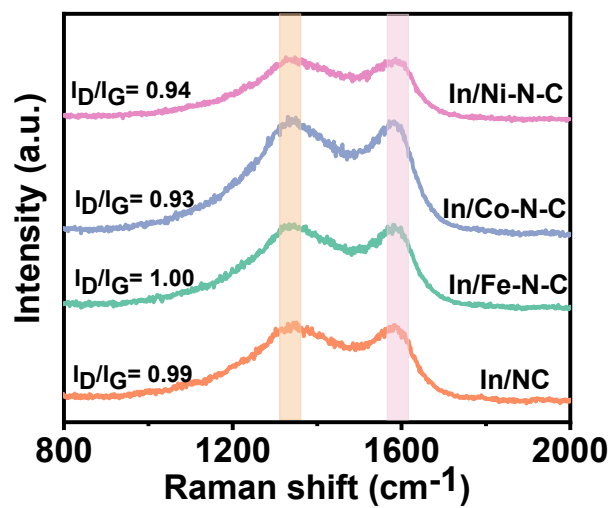

**Figure S10** Raman spectra of In/NC, In/Fe-N-C, In/Co-N-C, and In/Ni-N-C samples.

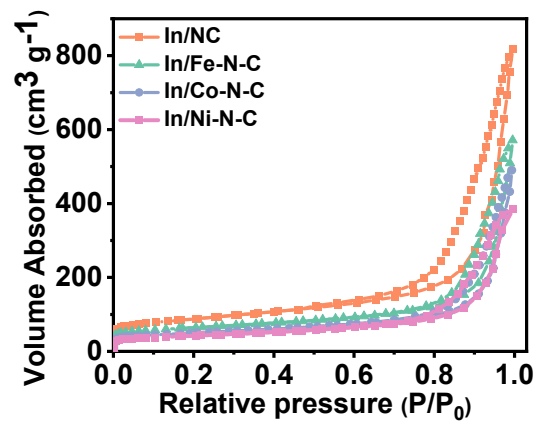

**Figure S11** The nitrogen absorption and desorption curves.

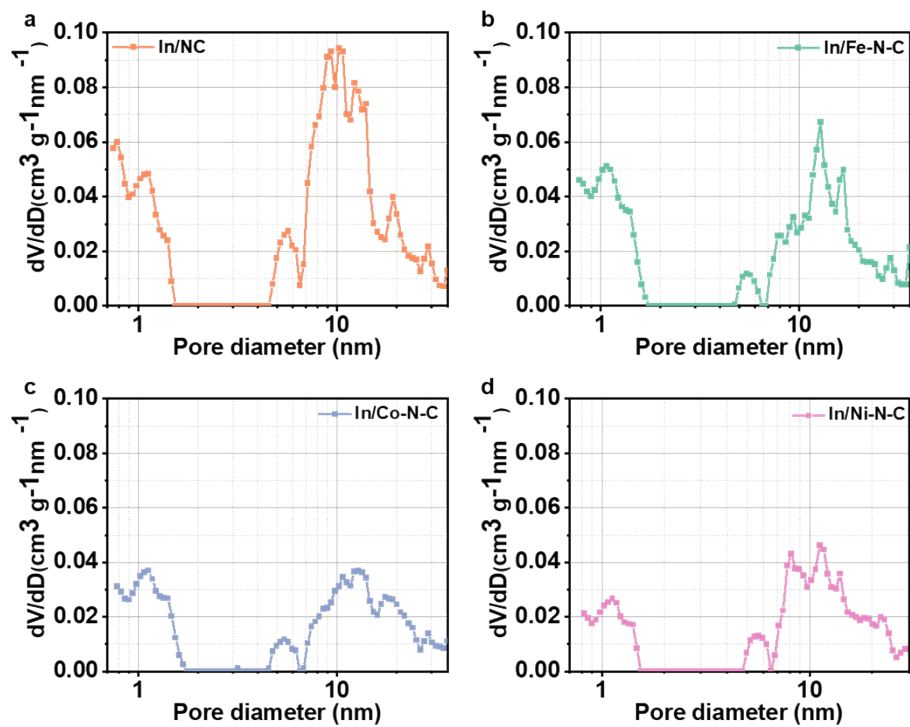

**Figure S12** Pore size distribution diagrams of In/NC, In/Fe-N-C, In/Co-N-C and In/Ni-N-C catalysts.

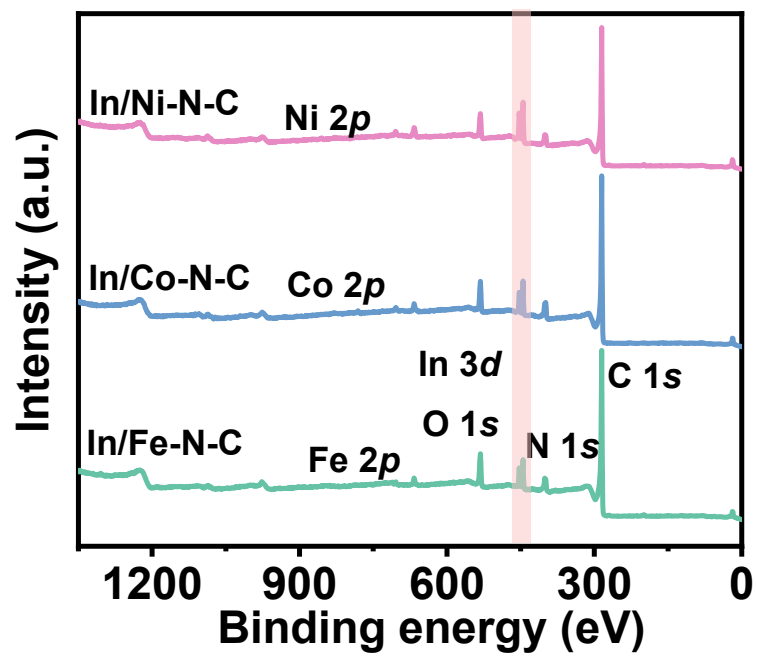

Figure S13 XPS survey spectrum.

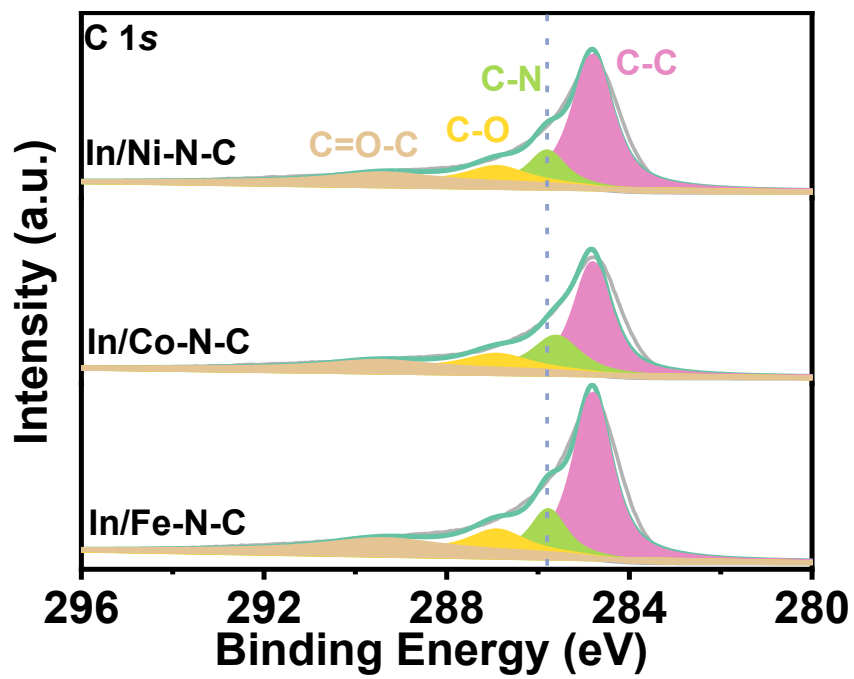

Figure S14 The C1s XPS spectra.

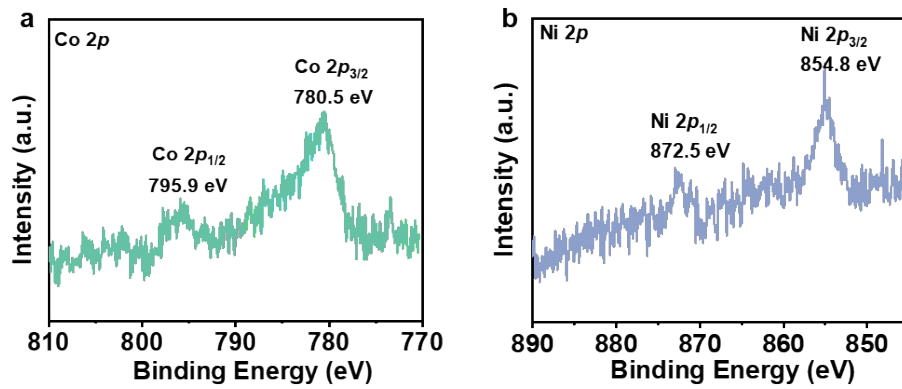

**Figure S15** (a) The Co 2p XPS spectra of In/Co-N-C. (b) The Ni 2p XPS spectra of In/Ni-N-C.



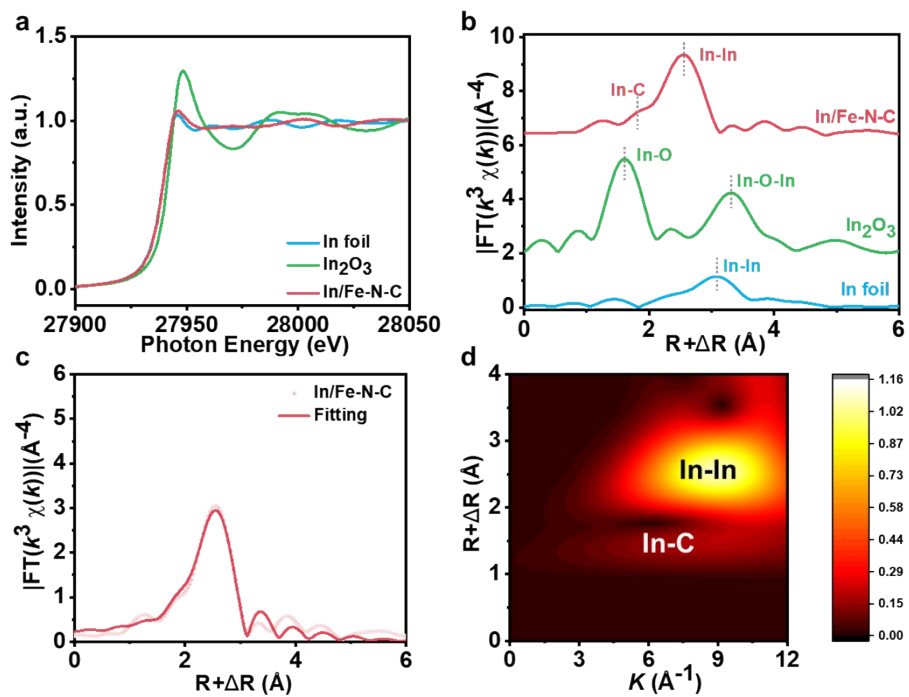

**Figure S16** (a) In K-edge XANES spectra of In/Fe-N-C, In foil and In<sub>2</sub>O<sub>3</sub>. (b) In K-edge FT-EXAFS spectra of In/Fe-N-C, In foil and In<sub>2</sub>O<sub>3</sub>. (c) FT-EXAFS fitting curve of In/Fe-N-C. (d) WT-EXAFS plots of In/Fe-N-C.

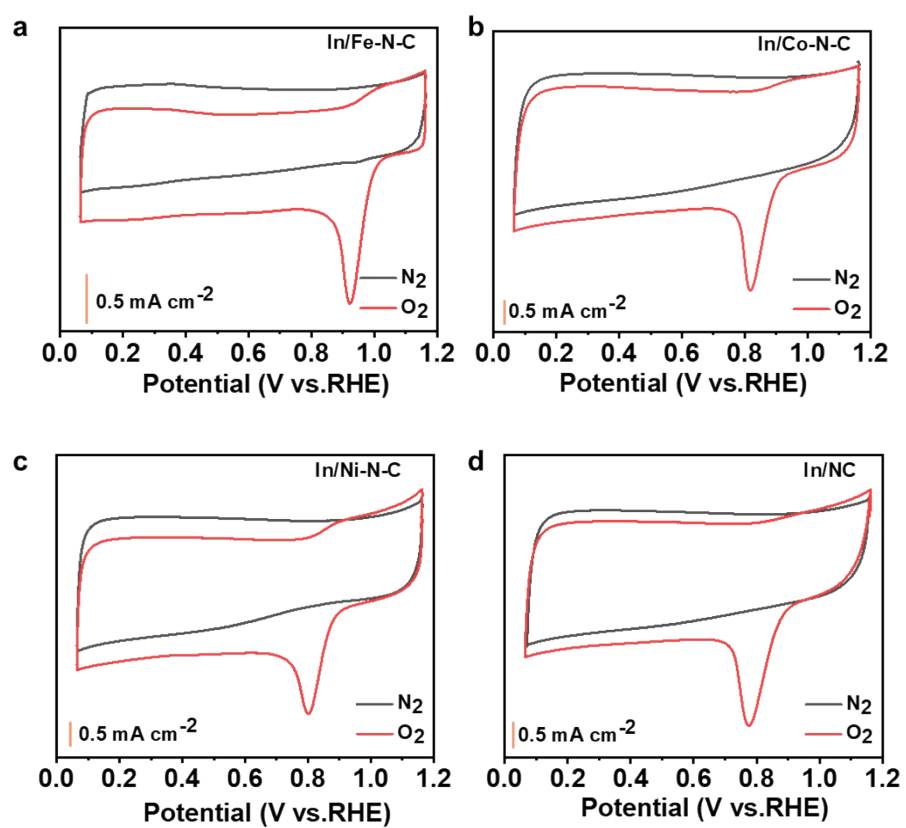

**Figure S17** CV curves of (a) In/Fe-N-C, (b) In/Co-N-C, (c) In/Ni-N-C, and (d) In/NC catalysts.

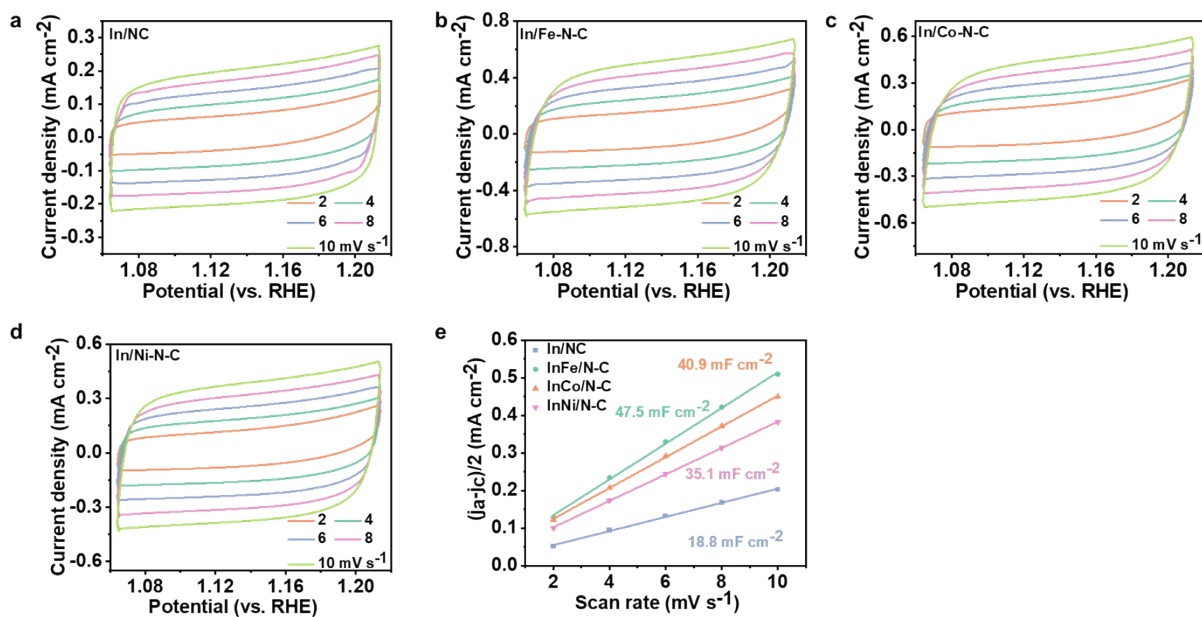

**Figure S18** CV curves of (a) In/NC, (b) In/Fe-N-C, (c) In/Co-N-C, and (d) In/Ni-N-C catalysts. (e) Electrochemical double-layer capacitance ( $C_{dl}$ ) of In/NC, In/Fe-N-C, In/Co-N-C and In/Ni-N-C catalysts.

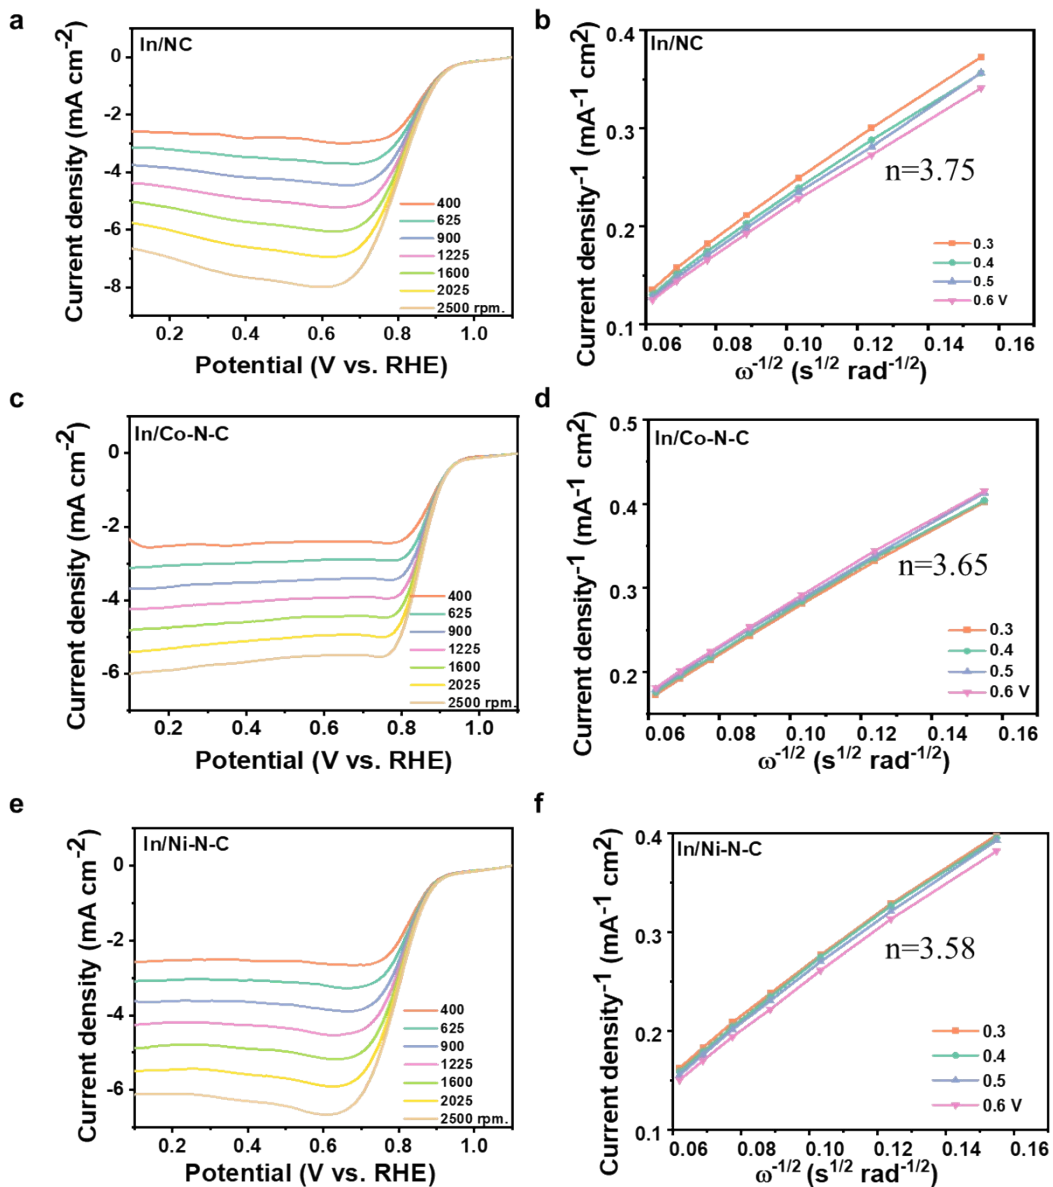

**Figure S19** (a) ORR polarization curves of In/NC at different rotating speeds. (b) K-L plots and electron-transfer numbers. (c) ORR polarization curves of In/Co-N-C at different rotating speeds. (d) K-L plots and electron-transfer numbers. (e) ORR polarization curves of In/Ni-N-C at different rotating speeds (f) K-L plots and electron-transfer numbers.

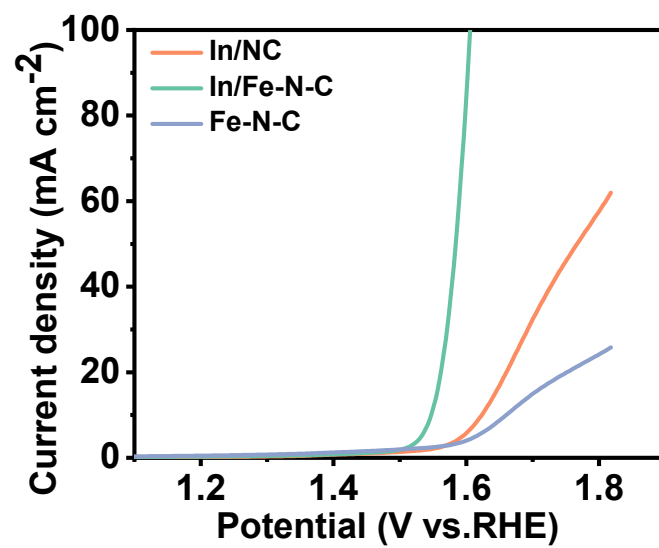

Figure S20 LSV curves for OER.

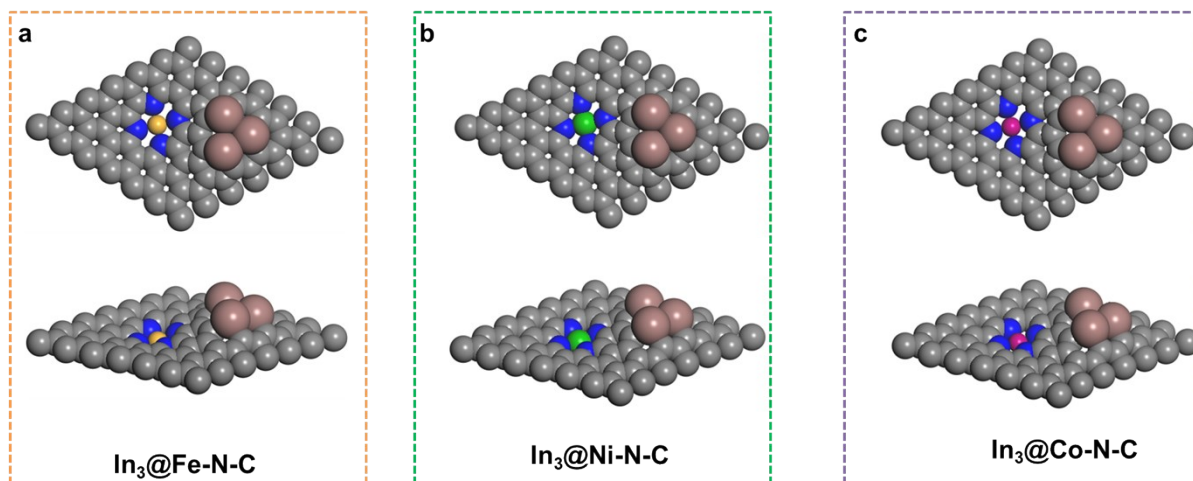

**Figure S21** Illustration of atomic configurations for three types of local structures.

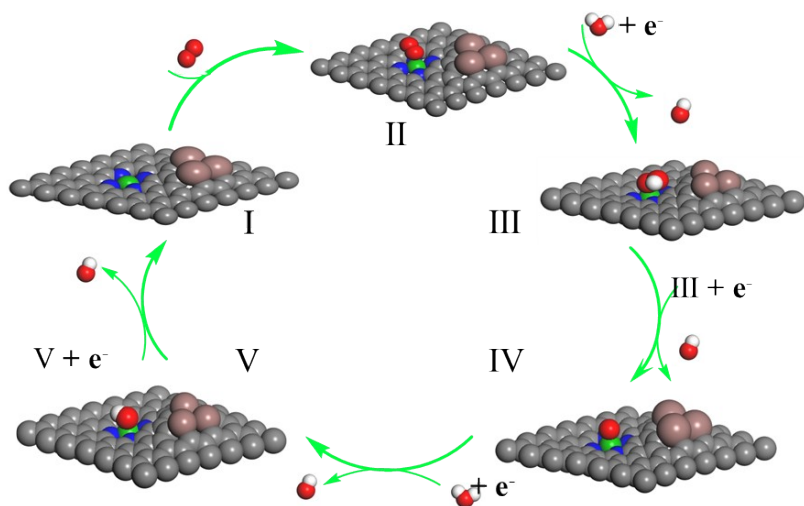

**Figure S22** The proposed ORR mechanism diagram on In/Ni-N-C.

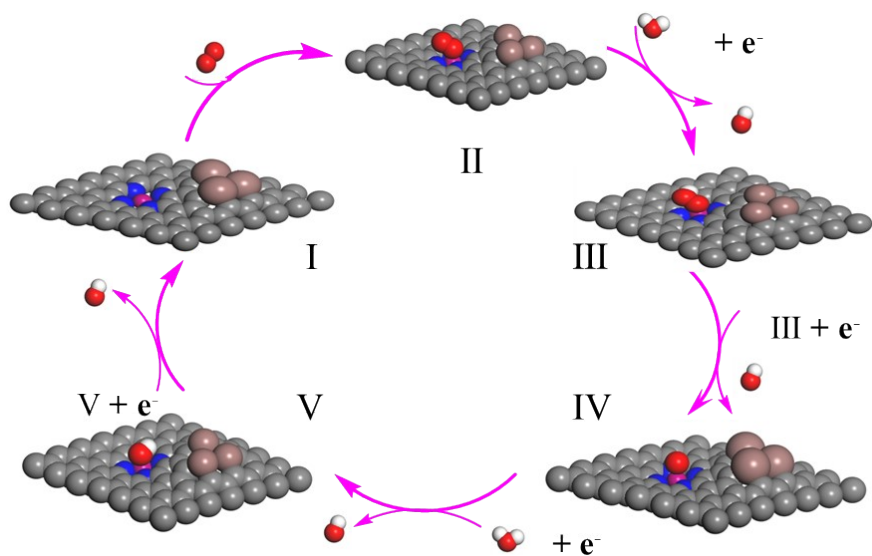

**Figure S23** The proposed ORR mechanism diagram on In/Co-N-C.



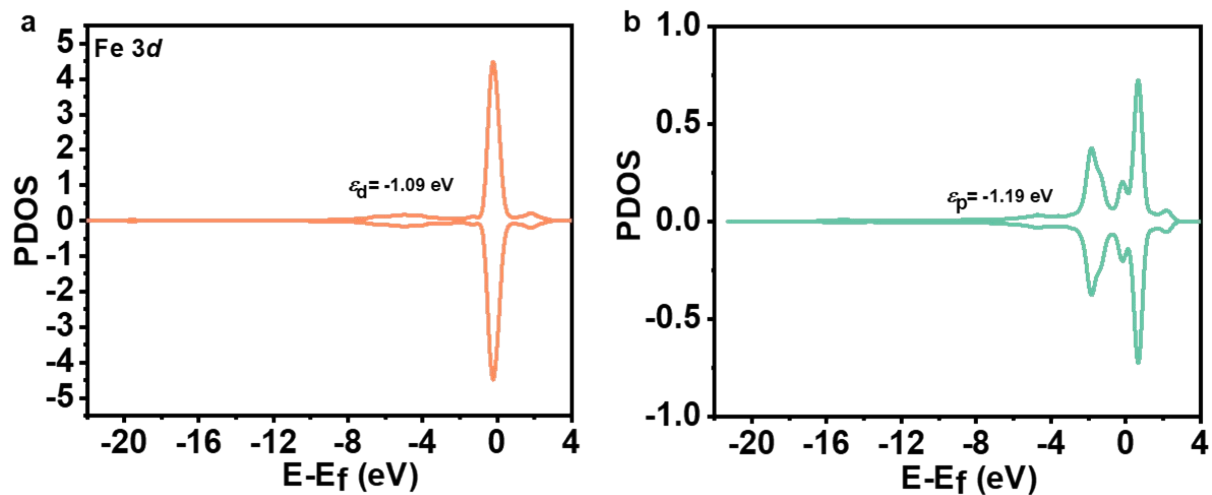

Figure S24 The PDOS curves for (a) Fe-N-C and (b)  $In_3-C$ .

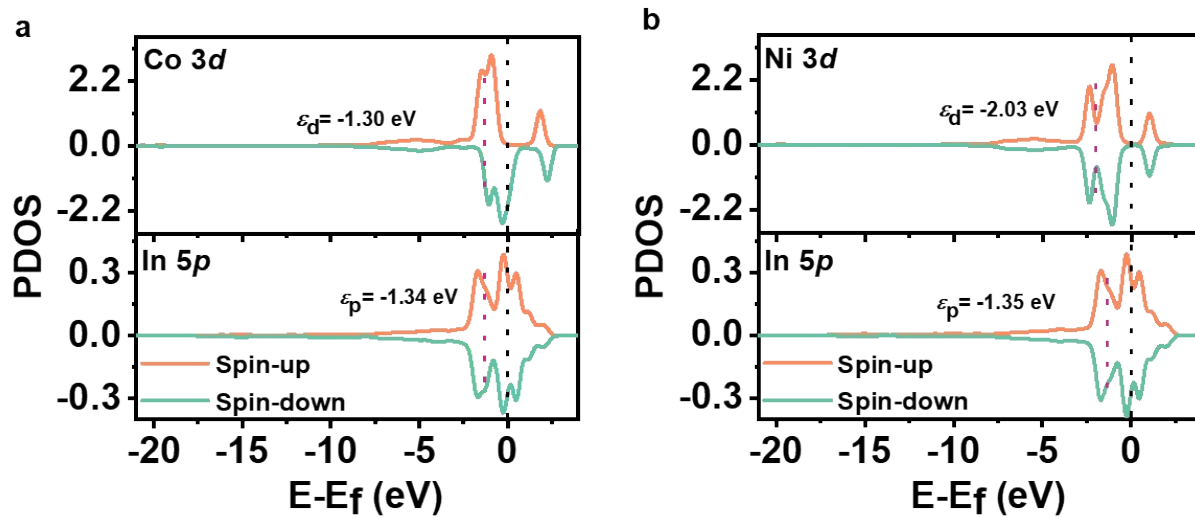

Figure S25 The PDOS curves for In/Co-N-C and In/Ni-N-C.

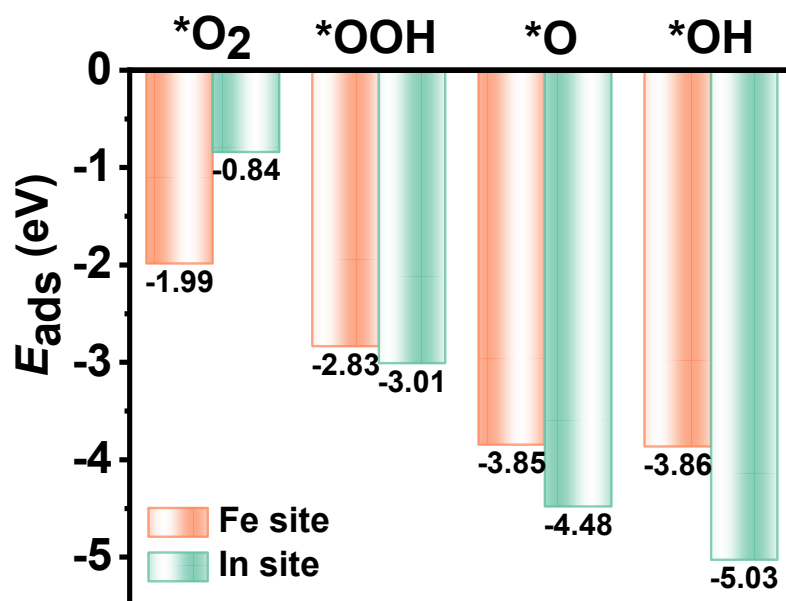

**Figure S26** The adsorption energy with different oxygenated intermediates on Fe and In site in In/Fe-N-C.

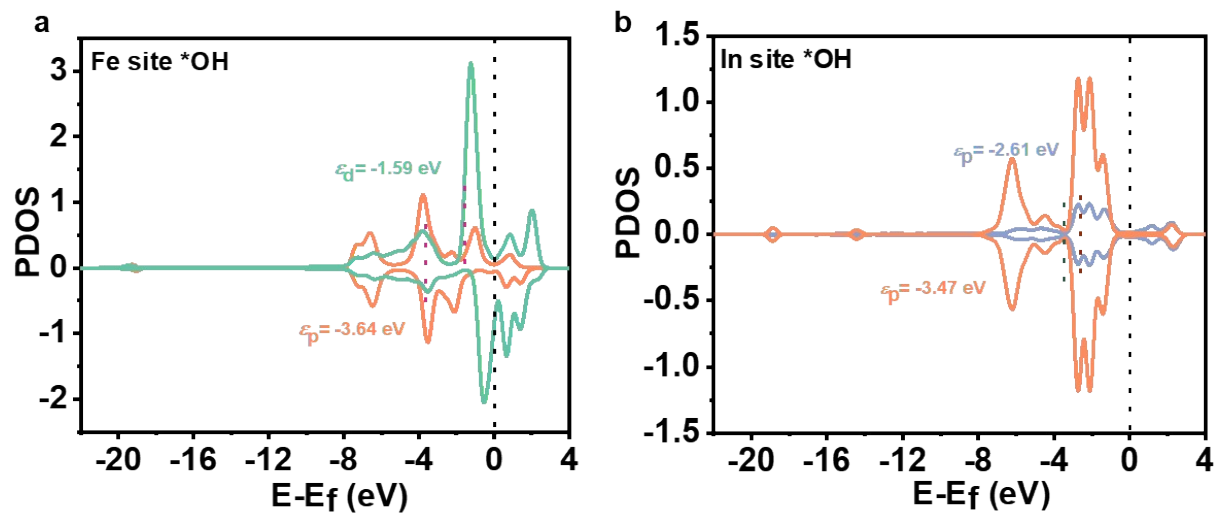

Figure S27 The PDOS curves for the adsorption of  $*OH$  on (a) Fe and (b) In site in In/Fe-N-C, respectively.

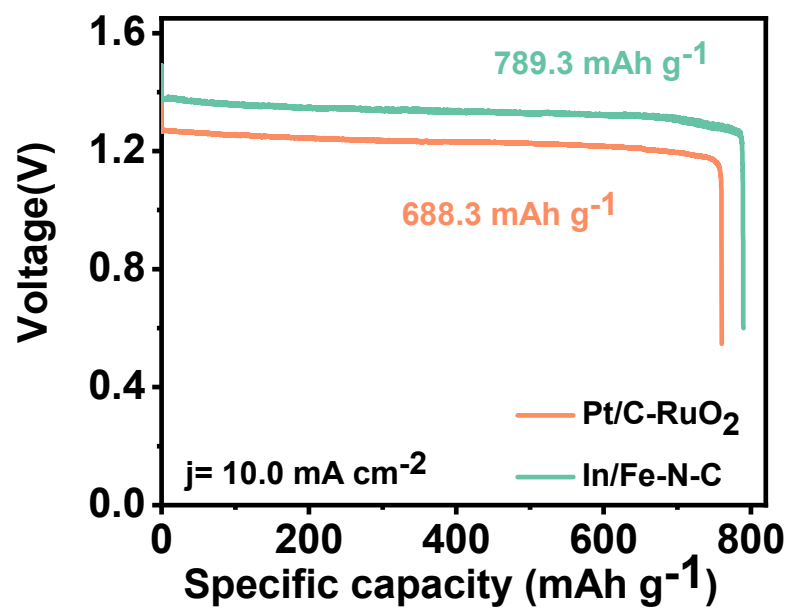

**Figure S28** Specific capacities of aqueous ZABs at 10 mA cm<sup>-2</sup> discharge current densities.

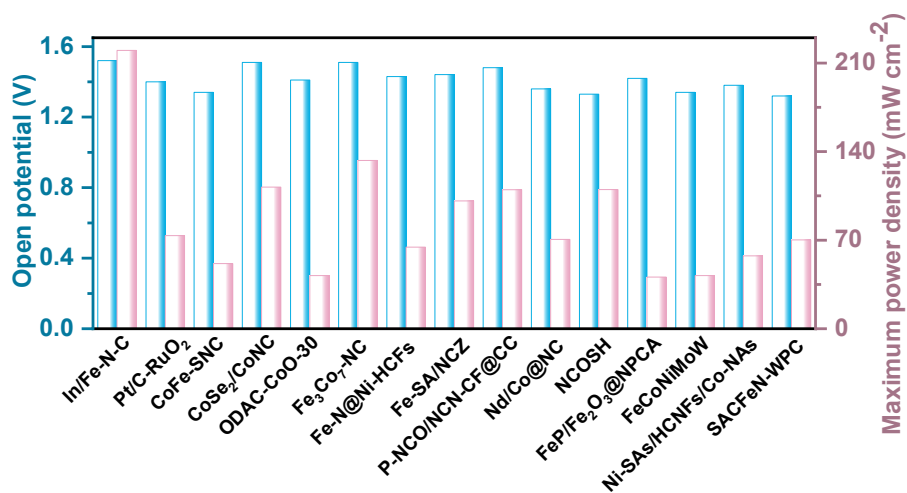

**Figure S29** The performance comparison of solid-state ZABs with recently reported non-precious metal catalysts.

**Table S1** The BET surface and pore volume of In/NC, In/Fe-N-C, In/Co-N-C, and In/Ni-N-C catalysts.

| Catalyst  | $S_{\text{BET}}$<br>( $\text{m}^2 \text{g}^{-1}$ ) | Pore Volume ( $\text{cm}^3 \text{g}^{-1}$ ) |
|-----------|----------------------------------------------------|---------------------------------------------|
| In/NC     | 309.6                                              | 1.066                                       |
| In/Fe-N-C | 230.0                                              | 0.730                                       |
| In/Co-N-C | 177.0                                              | 0.604                                       |
| In/Ni-N-C | 149.4                                              | 0.515                                       |

**Table S2** The element content of In/NC, In/Fe-N-C, In/Co-N-C and In/Ni-N-C catalysts from XPS results.

| Catalyst  | C (at.%) | N (at.%) | O (at.%) | In (at.%) | Fe/Co/Ni (at.%) |
|-----------|----------|----------|----------|-----------|-----------------|
| In/NC     | 83.61    | 6.22     | 9.12     | 1.05      | /               |
| In/Fe-N-C | 83.68    | 6.78     | 8.41     | 0.72      | 0.41 (Fe)       |
| In/Co-N-C | 82.80    | 6.92     | 8.95     | 1.09      | 0.24 (Co)       |
| In/Ni-N-C | 83.85    | 6.42     | 8.20     | 1.32      | 0.21 (Ni)       |



**Table S3.** The EXAFS fitting parameters at the Fe k-edge for Fe foil, and In/Fe-N-C ( $S_0^2 = 0.71$ ).

| Catalyst  | Path   | CN      | R(Å)      | $\sigma^2(\text{Å}^2)$ | $\Delta E_0$ (eV) | R factor |
|-----------|--------|---------|-----------|------------------------|-------------------|----------|
| Fe foil   | Fe-Fe1 | 6       | 2.85±0.01 | 0.00562                | -1.58             | 0.008    |
|           | Fe-Fe2 | 8       | 2.47±0.01 | 0.00446                |                   |          |
| In/Fe-N-C | Fe-N   | 3.7±0.2 | 2.00±0.01 | 0.00886                | 1.98              | 0.003    |

**Table S4.** The EXAFS fitting parameters at the In k-edge for In foil, and In/Fe-N-C ( $S_0^2 = 0.85$ ).

| Catalyst  | Path   | CN      | R(Å)      | $\sigma^2(\text{Å}^2)$ | $\Delta E_0$ (eV) | R factor |
|-----------|--------|---------|-----------|------------------------|-------------------|----------|
| In foil   | In-In1 | 4       | 3.10±0.01 | 0.0200                 | -1.50             | 0.006    |
|           | In-In2 | 8       | 3.29±0.01 | 0.0200                 | 2.00              |          |
| In/Fe-N-C | In-In  | 9.0±1.8 | 3.31±0.01 | 0.0200                 | -10.0             | 0.009    |
|           | In-C   | 0.9±0.2 | 2.13±0.01 | 0.0200                 | 3.00              |          |

$S_0^2$  is the amplitude reduction factor, CN is the coordination number; R is the interatomic distance;  $\Delta E_0$  is the inner potential correction;  $\sigma^2$  is Debye-Waller factor (a measure of thermal and static disorder in absorber-scatterer distances). R factor is used to value the fitting goodness.

**Table S5** The comparison of ORR and OER performance for Fe-based single-atom catalysts.

| Catalysts                                 | $E_{\text{onset}}$<br>(V vs.<br>RHE) | $E_{1/2}$ (V vs.<br>RHE) | $J_L$ (mA cm <sup>-2</sup> ) | $\eta_{10}$ (mV<br>vs. RHE) | Tafel<br>(mV dec <sup>-1</sup> ) | Ref.         |
|-------------------------------------------|--------------------------------------|--------------------------|------------------------------|-----------------------------|----------------------------------|--------------|
| In/Fe-N-C                                 | 1.05                                 | 0.92                     | 5.76                         | 318                         | 52.3                             | This<br>work |
| FeC/N-G-SA                                | N.A.                                 | 0.89                     | N.A.                         | 370                         | 73.0                             | [1]          |
| P-doped Fe-N-C                            | N.A.                                 | 0.882                    | 6.50                         | 365                         | 81.0                             | [2]          |
| Fe-N/P-C-700                              | 0.941                                | 0.867                    | 5.66                         | 430                         | N.A.                             | [3]          |
| SA-Fe-SNC@900                             | 1.01                                 | 0.876                    | N.A.                         | 402                         | N.A.                             | [4]          |
| Fe-NSDC                                   | 0.96                                 | 0.84                     | N.A.                         | 410                         | 59.0                             | [5]          |
| FeN <sub>4</sub> CB                       | N.A.                                 | 0.84                     | 5.58                         | 350                         | N.A.                             | [6]          |
| Fe/Ni-N-C                                 | 1.005                                | 0.861                    | 5.76                         | 322                         | 69.0                             | [7]          |
| Ni-N <sub>4</sub> /GHSs/Fe-N <sub>4</sub> | 0.93                                 | 0.83                     | N.A.                         | 390                         | 81.0                             | [8]          |
| CoFe-SNC                                  | 0.97                                 | 0.86                     | 5.50                         | 490                         | 78.7                             | [9]          |
| FePc&rGO                                  | 0.98                                 | 0.89                     | 5.40                         | N.A.                        | N.A.                             | [10]         |
| Co-CoN <sub>4</sub> @NCNs                 | 0.91                                 | 0.83                     | N.A.                         | 310                         | 78.1                             | [11]         |
| Fe-N@Ni-HCFs                              | N.A.                                 | 0.88                     | N.A.                         | 337                         | 54.7                             | [12]         |
| Fe-SA/NCZ                                 | 1.00                                 | 0.87                     | N.A.                         | 320                         | 51.0                             | [13]         |

**Table S6** The comparisons of aqueous ZABs performance for recently reported non-precious metal catalysts.

| Catalysts                                | Specific capacity (mAh g <sup>-1</sup> ) | Maximum power density (mW cm <sup>-1</sup> ) | Cycling performance (h)      | Ref.      |
|------------------------------------------|------------------------------------------|----------------------------------------------|------------------------------|-----------|
| In/Fe-N-C                                | 789.6                                    | 318.2                                        | 1650 @10 mA cm <sup>-1</sup> | This work |
| Co-CoN <sub>4</sub> @NCNs                | 776.7                                    | 118.8                                        | 500 @10 mA cm <sup>-1</sup>  | [11]      |
| NiFe-LDH/Fe1-N-C                         | N.A.                                     | 205.0                                        | 400 @2 mA cm <sup>-1</sup>   | [14]      |
| FePc&rGO                                 | 739.7                                    | 103.0                                        | 133 @5 mA cm <sup>-1</sup>   | [10]      |
| ODAC-CoO-30                              | N.A.                                     | 128.5                                        | 150 @5 mA cm <sup>-1</sup>   | [15]      |
| CoFe-SNC                                 | 776.3                                    | 76.5                                         | 135 @10 mA cm <sup>-1</sup>  | [9]       |
| FeP/Fe <sub>2</sub> O <sub>3</sub> @NPCA | 717.0                                    | 130.0                                        | 160 @5 mA cm <sup>-1</sup>   | [16]      |
| ZnSe@PNC-1000                            | 818.0                                    | 126.0                                        | 200 @5 mA cm <sup>-1</sup>   | [17]      |
| HfCo-N-C                                 | 795.0                                    | 184.0                                        | N.A.                         | [18]      |
| Ni-SAs/HCNFs/Co-NAs                      | N.A.                                     | 140.7                                        | 200 @10 mA cm <sup>-1</sup>  | [19]      |
| Co-N,P-HCS                               | 736.5                                    | 208.7                                        | 750 @5 mA cm <sup>-1</sup>   | [20]      |
| CoP <sub>3</sub> /CeO <sub>2</sub> /C-2  | 767.7                                    | 150.0                                        | 120 @5 mA cm <sup>-1</sup>   | [21]      |
| P/Fe-N-C                                 | 785.4                                    | 269.0                                        | 192 @10 mA cm <sup>-1</sup>  | [22]      |

**Table S7** The comparison of solid-state ZAB performance.

| Catalysts                                | Open-circuit voltage (V) | Maximum power density (mW cm <sup>-1</sup> ) | Ref.      |
|------------------------------------------|--------------------------|----------------------------------------------|-----------|
| In/Fe-N-C                                | 1.52                     | 220.0                                        | This work |
| Pt/C-RuO <sub>2</sub>                    | 1.40                     | 73.6                                         | This work |
| CoFe-SNC                                 | 1.34                     | 51.5                                         | [9]       |
| CoSe <sub>2</sub> /CoNC                  | 1.51                     | 112.0                                        | [23]      |
| ODAC-CoO-30                              | 1.41                     | 42.0                                         | [15]      |
| Fe <sub>3</sub> Co <sub>7</sub> -NC      | 1.51                     | 133.0                                        | [24]      |
| Fe-N@Ni-HCFs                             | 1.43                     | 64.5                                         | [12]      |
| Fe-SA/NCZ                                | 1.441                    | 101.0                                        | [13]      |
| P-NCO/NCN-CF@CC                          | 1.48                     | 109.8                                        | [25]      |
| Nd/Co@NC                                 | 1.36                     | 70.6                                         | [26]      |
| NCOSH                                    | 1.33                     | 110.0                                        | [27]      |
| FeP/Fe <sub>2</sub> O <sub>3</sub> @NPCA | 1.42                     | 40.8                                         | [16]      |
| FeCoNiMoW                                | 1.34                     | 42.05                                        | [28]      |
| Ni-SAs/HCNFs/Co-NAs                      | 1.38                     | 57.6                                         | [19]      |
| SACFeN-WPC                               | 1.32                     | 70.2                                         | [29]      |

## References

1. Xiao, M.; Xing, Z.; Jin, Z.; Liu, C.; Ge, J.; Zhu, J.; Wang, Y.; Zhao, X.; Chen, Z.. *Adv. Mater.* 2020, **32**, 2004900.
2. Sheng, J.; Sun, S.; Jia, G.; Zhu, S.; Li, Y. *ACS nano* 2022, **16**, 15994-16002.
3. Yuan, K.; Lützenkirchen-Hecht, D.; Li, L.; Shuai, L.; Li, Y.; Cao, R.; Qiu, M.; Zhuang, X.; Leung, M. K. H.; Chen, Y. et al. *J. Am. Chem. Soc.* 2020, **142**, 2404-2412.
4. Chen, Z.; Peng, X.; Chen, Z.; Li, T.; Zou, R.; Shi, G.; Huang, Y.; Cui, P.; Yu, J.; Chen, Y. et al. *Adv. Mater.* 2023, **35**, 2209948.
5. Zhang, J.; Zhang, M.; Zeng, Y.; Chen, J.; Qiu, L.; Zhou, H.; Sun, C.; Yu, Y.; Zhu, C.; Zhu, Z. *Small* 2019, **15**, 1900307.
6. Zhao, X.; Li, X.; Bi, Z.; Wang, Y.; Zhang, H.; Zhou, X.; Wang, Q.; Zhou, Y.; Wang, H.; Hu, G. *J. Energy Chem.* 2022, **66**, 514-524.
7. Li, H.; Wang, J.; Qi, R.; Hu, Y.; Zhang, J.; Zhao, H.; Zhang, J.; Zhao, Y. *Appl. Catal. B Environ.* 2021, **285**, 119778.
8. Chen, J.; Li, H.; Fan, C.; Meng, Q.; Tang, Y.; Qiu, X.; Fu, G.; Ma, T. *Adv. Mater.* 2020, **32**, 1900307.
9. Weng, C.-C.; Ren, J.-T.; Wang, H.-Y.; Lv, X.-W.; Song, Y.-J.; Wang, Y.-S.; Chen, L.; Tian, W.-W.; Yuan, Z.-Y. *Appl. Catal. B Environ.* 2022, **307**, 121190.
10. Mei, Z.-y.; Cai, S.; Zhao, G.; Jing, Q.; Sheng, X.; Jiang, J.; Guo, H. *Energy Storage Mater.* 2022, **50**, 12-20.
11. Ding, K.; Hu, J.; Luo, J.; Zhao, L.; Jin, W.; Liu, Y.; Wu, Z.; Zou, G.; Hou, H.; Ji, X. *Adv. Func. Mater.* 2022, **32**, 2207331.
12. Tian, Y.; Wu, Z.; Li, M.; Sun, Q.; Chen, H.; Yuan, D.; Deng, D.; Johannessen, B.; Wang, Y.; Zhong, Y. et al. *Adv. Func. Mater.* 2022, **32**, 2209273.
13. Jin, Z.; Jiao, D.; Dong, Y.; Liu, L.; Fan, J.; Gong, M.; Ma, X.; Wang, Y.; Zhang, W.; Zhang, L. et al. *Angew. Chem. Int. Ed.* 2023, **63**, e202318246.
14. Liu, Z. Q.; Liang, X.; Ma, F. X.; Xiong, Y. X.; Zhang, G.; Chen, G.; Zhen, L.; Xu, C. Y. *Adv. Energy Mater.* 2023, **13**, 2203609.
15. Tian, Y.; Liu, X.; Xu, L.; Yuan, D.; Dou, Y.; Qiu, J.; Li, H.; Ma, J.; Wang, Y.; Su, D. et al. *Adv. Func. Mater.* 2021, **31**, 2101239.
16. Wu, K.; Zhang, L.; Yuan, Y.; Zhong, L.; Chen, Z.; Chi, X.; Lu, H.; Chen, Z.; Zou, R.; Li, T. et al. *Appl. Catal. B Environ.* 2022, **307**, 121190.
17. Yang, L.; Yao, X.; Du, C.; Han, Z.; Jin, M.; Peng, S.; Ma, X.; Zhu, Y.; Zou, M.; Cao, C. Constructing delocalized electronic structures to motivate the oxygen reduction activity of zinc selenide for high-performance zinc-air battery. *Adv. Mater.* 2020, **32**, 2002292.
18. Duan, D.; Huo, J.; Chen, J.; Chi, B.; Chen, Z.; Sun, S.; Zhao, Y.; Zhao, H.; Cui, Z.; Liao, S. *Chem. Eng. J.* 2024, **481**, 148598.
19. Chen, Y.; Qiao, S.; Tang, Y.; Du, Y.; Zhang, D.; Wang, W.; Zhang, H.; Sun, X.; Liu, C. *Small* 2024, **20**, 2310491.
20. Wang, X.; Zhou, X.; Li, C.; Yao, H.; Zhang, C.; Zhou, J.; Xu, R.; Chu, L.; Wang, H.; Gu, M. et al. *ACS nano* 2022, **16**, 15273-15285.
21. Li, J.; Kang, Y.; Lei, Z.; Liu, P. *Adv. Mater.* 2022, **34**, 2204021.

22. Zhou, Y.; Lu, R.; Tao, X.; Qiu, Z.; Chen, G.; Yang, J.; Zhao, Y.; Feng, X.; Müllen, K. *Appl. Catal. B Environ.* 2023, **321**, 122029.
23. Xu, Q.; Peng, L.; Luo, K.; Zhong, J.; Zhang, C.; Yuan, D. *J. Am. Chem. Soc.* 2023, **145**, 3647-3655.
24. Gu, T.; Zhang, D.; Yang, Y.; Peng, C.; Xue, D.; Zhi, C.; Zhu, M.; Liu, J. *J. Colloid Interface Sci.* 2023, **643**, 73-81.
25. Liu, Y.; Jiang, Z.; Jiang, Z. *J. Adv. Func. Mater.* 2022, **33**, 2212299.
26. Fan, C.; Wang, X.; Wu, X.; Chen, Y.; Wang, Z.; Li, M.; Sun, D.; Tang, Y.; Fu, G. *Adv. Func. Mater.* 2023, **33**, 2302883.
27. Zheng, X.; Cao, Y.; Wu, Z.; Ding, W.; Xue, T.; Wang, J.; Chen, Z.; Han, X.; Deng, Y.; Hu, W. *Adv. Energy Mater.* 2022, **13**, 2203244.
28. He, R.; Yang, L.; Zhang, Y.; Jiang, D.; Lee, S.; Horta, S.; Liang, Z.; Lu, X.; Ostovari Moghaddam, A.; Li, J. et al. *Adv. Energy Mater.* 2022, **12**, 2103275.
29. Zhong, L.; Jiang, C.; Zheng, M.; Peng, X.; Liu, T.; Xi, S.; Chi, X.; Zhang, Q.; Gu, L.; Zhang, S. et al. *ACS Energy Letters* 2021, **6**, 3624-3633.
